# Supplementary material for: Encouraging Minority Undergraduates to Choose Science Careers: Career Paths Survey Results
Source: Atypon-hosted journal article supplement (doi:10.1187/cbe.08-04-0018), 2008-12-01
Supplement: suppmat.pdf [file suppmat.pdf]

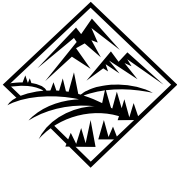

# BUSP-NIH Career Paths Survey

## UNDERGRADUATE EXPERIENCES

*To begin with, we'd like to learn about your experiences as an undergraduate at UC Davis.*

1. To the best of your recollection, how much did each of the following BUSP components contribute to your academic success as an undergraduate student?

|                                                                   | Not At All<br>↓          | Not<br>Very Much<br>↓    | Somewhat<br>↓            | A<br>Great Deal<br>↓     | Not Applicable<br>↓      |
|-------------------------------------------------------------------|--------------------------|--------------------------|--------------------------|--------------------------|--------------------------|
| Pre and co-courses<br>(taught through the Learning Skills Center) | <input type="checkbox"/> |
| BUSP courses (Freshman seminar, BIS 11)                           | <input type="checkbox"/> |
| BUSP advising                                                     | <input type="checkbox"/> |
| Research experiences<br>(BUSP sponsored and other)                | <input type="checkbox"/> |

3. Did you ever participate in any type of scientific research (independent of class requirements) while an undergraduate at UC Davis?

- No → **skip to Question 14.**  
 Yes

4. What kind of research experience(s) did you have?  
(*Select all that apply.*)

- BUSP-sponsored research (for pay)  
 Research course (taken for credit)  
 Internship  
 Summer research at UCD  
 Summer research elsewhere  
 Other (please specify) \_\_\_\_\_

5. Did you do laboratory research, field research, or some other kind of research? (*Check all that apply.*)

- Lab research  
 Field research  
 Other kind of research (*please specify*): \_\_\_\_\_  
 \_\_\_\_\_

6. To the best of your recollection, how much did your research experience(s) help you understand concepts from your science coursework?

- Not at all  
 Not very much  
 Somewhat  
 A great deal

7. Did your research experience(s) influence your choice of undergraduate major in any way?

- No → **skip to Question 9.**  
 Yes

8. How did your undergraduate research experience(s) influence your choice of major?

9. Did your research experience(s) influence your career choice in any way?

- No → **skip to Question 11.**  
 Yes

10. How did your undergraduate research experience(s) influence your career choice?

Survey ID # \_\_\_\_\_  
 (Used to keep your answers confidential.)

11. Overall, which of the following phrases best describes your undergraduate research experience(s)?

- Very negative
- Somewhat negative
- Neutral
- Somewhat positive
- Very positive

12. How often do you use knowledge from your undergraduate research experience(s) in your current employment or educational activities?

- Never →*skip to **Question 15.***
- Rarely
- Sometimes
- Often

13. How have you used knowledge from your undergraduate research experience(s) in your current work or educational activities? Please explain.

→*skip to **Question 15.***

14. Why did you choose not to participate in research?

15. During your undergraduate years at UC Davis, did anyone associated with the university provide advice or encouragement to you regarding your classes, major, or career?

- No →*skip to **Question 18.***
- Yes

16. Who advised or encouraged you? (*Check all that apply.*)

- Research director/ research professor
- Professor (non-research)
- BUSP advisor
- Non-BUSP staff advisor
- Teaching assistant
- Post-doc
- Graduate student
- Lab technician
- Someone else (*please specify*): \_\_\_\_\_

17. How did that person (or those people) advise or encourage you?

**CAREER CHOICES**

*The next questions inquire about your career choices.*

18. Below are fields in which some BUSP graduates are employed.

Please check at least one box in EACH COLUMN to indicate:

|                                              | <b>The field(s) you were interested in when you entered college.</b><br><i>(Check all that apply).</i> | <b>The field you are most likely to end up in.</b><br><i>(Check one only)</i> |
|----------------------------------------------|--------------------------------------------------------------------------------------------------------|-------------------------------------------------------------------------------|
| Business, management                         | <input type="checkbox"/>                                                                               | <input type="checkbox"/>                                                      |
| Communications, media                        | <input type="checkbox"/>                                                                               | <input type="checkbox"/>                                                      |
| Computer analyst, programming (non-academic) | <input type="checkbox"/>                                                                               | <input type="checkbox"/>                                                      |
| Dentist                                      | <input type="checkbox"/>                                                                               | <input type="checkbox"/>                                                      |
| Engineer                                     | <input type="checkbox"/>                                                                               | <input type="checkbox"/>                                                      |
| Environment, natural resources               | <input type="checkbox"/>                                                                               | <input type="checkbox"/>                                                      |
| Government, public policy, politics          | <input type="checkbox"/>                                                                               | <input type="checkbox"/>                                                      |
| Human/social services                        | <input type="checkbox"/>                                                                               | <input type="checkbox"/>                                                      |
| Lab technician                               | <input type="checkbox"/>                                                                               | <input type="checkbox"/>                                                      |
| Lawyer                                       | <input type="checkbox"/>                                                                               | <input type="checkbox"/>                                                      |
| Nurse                                        | <input type="checkbox"/>                                                                               | <input type="checkbox"/>                                                      |
| Parent (full time)                           | <input type="checkbox"/>                                                                               | <input type="checkbox"/>                                                      |
| Pharmacist                                   | <input type="checkbox"/>                                                                               | <input type="checkbox"/>                                                      |
| Physician                                    | <input type="checkbox"/>                                                                               | <input type="checkbox"/>                                                      |
| Professor (university or college)            | <input type="checkbox"/>                                                                               | <input type="checkbox"/>                                                      |
| Psychologist - clinical (non-academic)       | <input type="checkbox"/>                                                                               | <input type="checkbox"/>                                                      |
| Researcher (university or non-profit)        | <input type="checkbox"/>                                                                               | <input type="checkbox"/>                                                      |
| Researcher (industry)                        | <input type="checkbox"/>                                                                               | <input type="checkbox"/>                                                      |
| Teacher, administrator (K-12)                | <input type="checkbox"/>                                                                               | <input type="checkbox"/>                                                      |
| Therapist (physical or occupational)         | <input type="checkbox"/>                                                                               | <input type="checkbox"/>                                                      |
| Veterinarian                                 | <input type="checkbox"/>                                                                               | <input type="checkbox"/>                                                      |
| Other medical                                | <input type="checkbox"/>                                                                               | <input type="checkbox"/>                                                      |
| Other                                        | <input type="checkbox"/>                                                                               | <input type="checkbox"/>                                                      |
| Undecided                                    | <input type="checkbox"/>                                                                               | <input type="checkbox"/>                                                      |

19. Which of the following statements would make a career as a PhD scientific researcher APPEALING to you-- whether or not you have ever considered it as a career?  
*(Select all that apply.)*

- I would get satisfaction from doing research.
- They pay for your education in graduate school.
- I would have the opportunity to mentor minority students.
- Science is really interesting to me.
- The scientific knowledge I create will help members of my community.
- Other people respect the work of PhD scientific researchers.
- PhD scientific researchers can make a decent living.
- I would have the opportunity to teach undergraduates.

20. Which of the following reasons would make a career as a PhD scientific researcher UNAPPEALING to you-- whether or not you have ever considered it as a career?  
*(Select all that apply.)*

- Other jobs offer greater financial rewards.
- I am too much in debt to consider getting a PhD.
- Other careers contribute more to the public good.
- It is hard to get a decent job as a PhD scientific researcher.
- Other careers could better accommodate my plans for raising a family.
- Other careers have more prestige.
- Getting a PhD takes too long.
- I might have to move away from my family to find a job.

**EMPLOYMENT EXPERIENCES**

*The next questions ask about your significant employment experiences since completing your undergraduate degree at UC Davis.*

By **significant employment**, we mean jobs that meet the following criteria:

- 1) the job lasted for **more than one month**; and
- 2) you considered it to be your **main employment** at that time.

Please **exclude** employment directly associated with graduate or professional education (e.g, RA and TA).

Please **do include** teaching or research jobs that were not directly associated with your education.

21. Have you had *any* significant employment at any time since completing your undergraduate degree?  
*(Significant employment refers to scheduled employment that lasted a month or more, was considered your main job at the time, and was not directly associated with a graduate or professional degree program.)*

- No → **skip to Question 29.**
- Yes

22. Tell us about your significant employment experiences after completing your undergraduate degree at UC Davis. Starting with Column A, please answer the questions in each row.

|                                                                                         | Column A                                                                                                                               | Column B                                                                                                                               | Column C                                                                                                                               |
|-----------------------------------------------------------------------------------------|----------------------------------------------------------------------------------------------------------------------------------------|----------------------------------------------------------------------------------------------------------------------------------------|----------------------------------------------------------------------------------------------------------------------------------------|
|                                                                                         | <b>Your FIRST job after graduating from UCD</b>                                                                                        | <b>Your SECOND job after graduating from UCD</b>                                                                                       | <b>Your THIRD job after graduating from UCD</b>                                                                                        |
| <b>What was your job?</b>                                                               |                                                                                                                                        |                                                                                                                                        |                                                                                                                                        |
| <b>Who was your employer at this job?</b>                                               |                                                                                                                                        |                                                                                                                                        |                                                                                                                                        |
| <b>In what year did you begin this job?</b>                                             |                                                                                                                                        |                                                                                                                                        |                                                                                                                                        |
| <b>In what year did you leave this job (leave blank if you're still working there)?</b> |                                                                                                                                        |                                                                                                                                        |                                                                                                                                        |
| <b>Have you had any other significant employment since this job?</b>                    | <input type="checkbox"/> No → <b>skip to <u>Q. 25</u></b><br><input type="checkbox"/> Yes → <b>continue to top of <u>Column B.</u></b> | <input type="checkbox"/> No → <b>skip to <u>Q. 25</u></b><br><input type="checkbox"/> Yes → <b>continue to top of <u>Column C.</u></b> | <input type="checkbox"/> No → <b>skip to <u>Q. 25</u></b><br><input type="checkbox"/> Yes → <b>continue to top of <u>Column D.</u></b> |

|                                                                                         | Column D                                                                                                                              | Column E                                                                                                                               | Column F                                                                                                                           |
|-----------------------------------------------------------------------------------------|---------------------------------------------------------------------------------------------------------------------------------------|----------------------------------------------------------------------------------------------------------------------------------------|------------------------------------------------------------------------------------------------------------------------------------|
|                                                                                         | <b>Your FOURTH job after graduating from UCD</b>                                                                                      | <b>Your FIFTH job after graduating from UCD</b>                                                                                        | <b>Your SIXTH job after graduating from UCD</b>                                                                                    |
| <b>What was your job?</b>                                                               |                                                                                                                                       |                                                                                                                                        |                                                                                                                                    |
| <b>Who was your employer at this job?</b>                                               |                                                                                                                                       |                                                                                                                                        |                                                                                                                                    |
| <b>In what year did you begin this job?</b>                                             |                                                                                                                                       |                                                                                                                                        |                                                                                                                                    |
| <b>In what year did you leave this job (leave blank if you're still working there)?</b> |                                                                                                                                       |                                                                                                                                        |                                                                                                                                    |
| <b>Have you had any other significant employment since this job?</b>                    | <input type="checkbox"/> No → <b>skip to <u>Q 25</u></b><br><input type="checkbox"/> Yes → <b>continue to top of <u>Column E.</u></b> | <input type="checkbox"/> No → <b>skip to <u>Q. 25</u></b><br><input type="checkbox"/> Yes → <b>continue to top of <u>Column F.</u></b> | <input type="checkbox"/> No → <b>skip to <u>Q. 25</u></b><br><input type="checkbox"/> Yes → <b>continue to <u>Question 23.</u></b> |

23. Have you had any other significant employment since graduating from UC Davis?

- No →*skip to Question 25.*
- Yes

24. Please tell us about your other employment experiences.

25. Why did you choose your current occupation? Please tell us about the specific people, events, impressions, or experiences that influenced your choice.

26. How likely are you to stay in your present occupation for the next two years?

- Not at all likely
- Not very likely
- Somewhat likely →*skip to Question 29.*
- Very likely →*skip to Question 29.*

27. What occupation are you considering switching to?

28. Why are you considering switching to this occupation?

## POSTGRADUATE EDUCATIONAL EXPERIENCES

*The next section asks about any postgraduate education you may have initiated.*

29. Which of the following statements best characterizes your experiences with postgraduate education?

- I have never enrolled in a post-graduate degree program, nor do I have plans to do so in the future. →*skip to Q. 40.*
- I am planning to pursue post-graduate education at some time in the future.
- I have applied and been accepted into a post-graduate program, but I have not yet enrolled.
- I was enrolled in a post-graduate program, but I did not complete it. →*skip to Q. 35.*
- I am currently enrolled in a post-graduate program. →*skip to Q. 33.*
- I have completed a post-graduate degree. →*skip to Q. 38.*
- I have completed a post-graduate degree & am also currently enrolled in a post-graduate program. →*skip to Q. 33.*
- Other (please specify) \_\_\_\_\_ →*skip to Q. 40.*

30. What type of degree(s) do you plan to obtain? (*Select all that apply.*)

- Post-baccalaureate (non-degree)
- 2nd BA/BS/AB
- Teaching credential
- MA/MS
- MFA
- MBA
- JD/LLB
- MD
- DO
- DDS
- DVM
- PhD
- MD/PhD
- Other (*please specify*) \_\_\_\_\_

31. In what field and/or subspecialty will your graduate or professional degree be? \_\_\_\_\_

***If you have not yet been accepted to a graduate or professional school program,  
→skip to Question 40.***

32. Tell us more about your graduate, professional, or post-baccalaureate program.

At what institution will you enroll? \_\_\_\_\_

In what department or program will you be enrolled? \_\_\_\_\_

In what month and year will you begin your degree program? \_\_\_\_\_ (month/year)

When do you expect to complete your degree? \_\_\_\_\_ (month/year)

***→skip to Question 40.***

33. What type of degree program(s) are you currently enrolled in? (*Select all that apply.*)

Post-baccalaureate (non-degree)

2nd BA/BS/AB

Teaching credential

MA/MS

MFA

MBA

JD/LLB

MD

DO

DDS

DVM

PhD

MD/PhD

Other (*please specify*) \_\_\_\_\_

34. Tell us about your graduate, professional, or post-baccalaureate program.

At what institution are you enrolled? \_\_\_\_\_

In what department or program are you enrolled? \_\_\_\_\_

What year did you begin the program? \_\_\_\_\_ (month/year)

When do you expect to complete your degree? \_\_\_\_\_ (month/year)

***If you have also completed a degree program, → skip to Question 38;  
otherwise, → skip to Question 40***

35. What type of degree program(s) were you enrolled in? (*Select all that apply.*)

Post-baccalaureate (non-degree)

2nd BA/BS/AB

Teaching credential

MA/MS

MFA

MBA

JD/LLB

MD

DO

DDS

DVM

PhD

MD/PhD

Other (*please specify*) \_\_\_\_\_

36. Why didn't you complete your degree program?

37. Were you awarded a degree, even though you did not complete the full degree program?

- No →*skip to **Question 40***
- Yes

38. What degree(s) have you completed? (*Select all that apply.*)

- Post-baccalaureate (non-degree)
- 2nd BA/BS/AB
- Teaching credential
- MA/MS
- MFA
- MBA
- JD/LLB
- MD
- DO
- DDS
- DVM
- PhD
- MD/PhD
- Other (*please specify*) \_\_\_\_\_

39. Tell us about your graduate or professional program(s).

What institution granted your degree? \_\_\_\_\_

In what subject or specialty area is your degree? \_\_\_\_\_

When did you begin the program? \_\_\_\_\_ (month/year)

When did you complete your degree? \_\_\_\_\_ (month/year)

## BACKGROUND INFORMATION

*Before you finish the survey, we'd like to learn about your college finances and family background.*

40. What is your best estimate of the total amount you owed for your undergraduate education when you graduated from UC Davis?

- Nothing →*skip to **Question 42.***
- \$1 to \$5,000
- \$5,001 to \$10,000
- \$10,001 to \$15,000
- \$15,001 to \$20,000
- \$20,001 to \$25,000
- Over \$25,000
- Don't know

41. Has this loan been paid off?

- No
- Yes

42. What is the highest level of education completed by your mother (biological or adoptive) or female legal guardian?

- 8th grade or less →*skip to **Question 44.***
- 9-12 grade, no diploma →*skip to **Question 44.***
- High school diploma →*skip to **Question 44.***
- Some college, no degree →*skip to **Question 44.***
- Associate's degree (AA, AS) →*skip to **Question 44.***
- Bachelor's degree (AB, BA, BS, BSc)
- Some graduate/professional school, no degree
- Master's degree (MA, MS, MFA, MBA, etc.)
- Professional degree (JD, MD, DDS, etc.)
- Doctoral degree (Ph.D., Ed.D., etc.)
- Don't know →*skip to **Question 44.***

43. In what field or major is her highest degree?

44. Has your mother (biological or adopted) or female legal guardian ever worked for pay?

- Yes
- No →*skip to **Question 46.***
- Don't know →*skip to **Question 46.***

45. What specific kind of work does she do? (If unemployed, retired or deceased, please list the most recent job she held.)

46. What is the highest level of education completed by your father (biological or adoptive) or male legal guardian?

- 8th grade or less →*skip to Question 48.*
- 9-12 grade, no diploma →*skip to Question 48.*
- High school diploma →*skip to Question 48.*
- Some college, no degree →*skip to Question 48.*
- Associate's degree (AA, AS) →*skip to Question 48.*
- Bachelor's degree (AB, BA, BS, BSc)
- Some graduate/professional school, no degree
- Master's degree (MA, MS, MFA, MBA, etc.)
- Professional degree (JD, MD, DDS, etc.)
- Doctoral degree (Ph.D., Ed.D., etc.)
- Don't know →*skip to Question 48.*

47. In what field or major is his highest degree?

48. Has your father (biological or adopted) or male legal guardian ever worked for pay?

- Yes
- No →*skip to Question 50.*
- Don't know →*skip to Question 50.*

49. What specific kind of work does he do? (If unemployed, retired or deceased, please list the most recent job he held.)

## CONCLUSION

*Only a few more questions will complete the survey!*

50. During the next eighteen months, we will be conducting telephone interviews with a subsample of BUSP alumni regarding their career pathways. Are you willing to be part of this follow-up research process?

- No
- Yes

51. What is the best way to reach you approximately six months from now?

Name (if changed after leaving UCD): \_\_\_\_\_

Street: \_\_\_\_\_

City: \_\_\_\_\_ State: \_\_\_\_\_ Zip: \_\_\_\_\_

Phone (land): \_\_\_\_\_

Phone (cell): \_\_\_\_\_

E-mail: \_\_\_\_\_

**You are done with the survey.**

**Please return this form in the enclosed addressed, stamped envelope.**

**THANK YOU for your contribution to this important research project!**

**A final summary of survey results (no individual responses) will be published on the BUSP website in 2006.**

**A subsample of survey participants will be contacted for interviews in 2006.**

**We look forward to talking with you!**

**Do you have any other comments about BUSP, UC Davis, or information about yourself that you would like to add? If so, please add them in the space below.**
